# Supplementary material for: Study of catalytic ozonation for tetracycline hydrochloride degradation in water by silicate ore supported Co3O4
Source: Royal Society of Chemistry journal article supplement (doi:10.1039/c8ra08402e), 2018-01-01
Supplement: c8ra08402e1.pdf [file c8ra08402e1.pdf]

## **Study of Catalytic ozonation for Tetracycline hydrochloride**

### **Degradation in water by silicate ore supported $\text{Co}_3\text{O}_4$**

***Lisha Luo<sup>abc</sup>, Donglei Zou<sup>a</sup>, Dongwei Lu<sup>c\*</sup>, Fengli Yu<sup>b</sup>,***

***Bingjing Xin<sup>b</sup>, Jun Ma<sup>c</sup>,***

*<sup>a</sup>Jilin University, Key Laboratory of Groundwater Resources and Environment, Ministry of Education, Jiefang Road 2519, Jilin, 130000, China*

*<sup>b</sup>College of Resources and Environmental Engineering, Jilin Institute of Chemical Technology, Jilin132022, China*

*<sup>c</sup>State Key Laboratory of Urban Water Resource and Environment, Harbin Institute of Technology, Harbin 150090, PR China*

*Corresponding Author: [lvdongwei@hit.edu.cn](mailto:lvdongwei@hit.edu.cn)*

Table S1 Physicochemical property of tetracycline hydrochloride

|                      |                                  |  |
|----------------------|----------------------------------|--|
| Name                 | Tetracycline hydrochloride (TCH) |  |
| Formula              | $C_{22}H_{24}N_2O_8 \cdot HCl$   |  |
| FW ( $g\ mol^{-1}$ ) | 480.9                            |  |
| $\lambda_{max}$ (nm) | 365                              |  |
| Structure            |                                  |  |

Table S2 Content of Co element in CoSO and concentration of leached cobalt ions

| Impregnation concentration | Content of Co element in | Concentration of leached cobalt |
|----------------------------|--------------------------|---------------------------------|
|                            | CoSO                     | ions                            |
| 0.3 mol L <sup>-1</sup>    | 6.3%                     | 0.009 mg L <sup>-1</sup>        |
| 0.5 mol L <sup>-1</sup>    | 11.2%                    | 0.014 mg L <sup>-1</sup>        |
| 1.0 mol L <sup>-1</sup>    | 24.3%                    | 0.025 mg L <sup>-1</sup>        |
| 1.5 mol L <sup>-1</sup>    | 30.5%                    | 0.030 mg L <sup>-1</sup>        |

Table S3 First-order rate constants for TCH and TOC removal among different processes.

| Process             | TCH                    |                | TOC                    |                |
|---------------------|------------------------|----------------|------------------------|----------------|
|                     | k (min <sup>-1</sup> ) | R <sup>2</sup> | k (min <sup>-1</sup> ) | R <sup>2</sup> |
| CoSO/O <sub>3</sub> | 0.110 ± 0.006          | 0.993          | 0.014 ± 0.001          | 0.992          |
| SO/O <sub>2</sub>   | 0.012 ± 0.001          | 0.986          | 0.002 ± 0.0001         | 0.997          |
| O <sub>3</sub>      | 0.024 ± 0.001          | 0.996          | 0.004 ± 0.0003         | 0.986          |
| CoSO/O <sub>2</sub> | 0.012 ± 0.001          | 0.989          | 0.002 ± 0.0002         | 0.997          |
| SO/O <sub>3</sub>   | 0.048 ± 0.002          | 0.998          | 0.007 ± 0.0004         | 0.971          |

The uncertainty of rate constants corresponds to 95% confidence level. The total degree of freedom was 9.

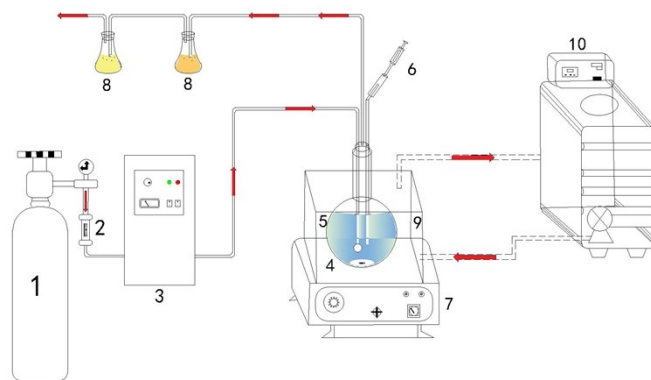

Fig. S1. Schematic of experimental apparatus for ozonation. (1, dry air; 2, gas flowmeter; 3, ozone generator; 4, microporous titanium diffuser; 5, ozonation reactor; 6, sampling point; 7, magnetic stirrer; 8, KI trap; 9, constant temperature water bath; 10, cryostat).

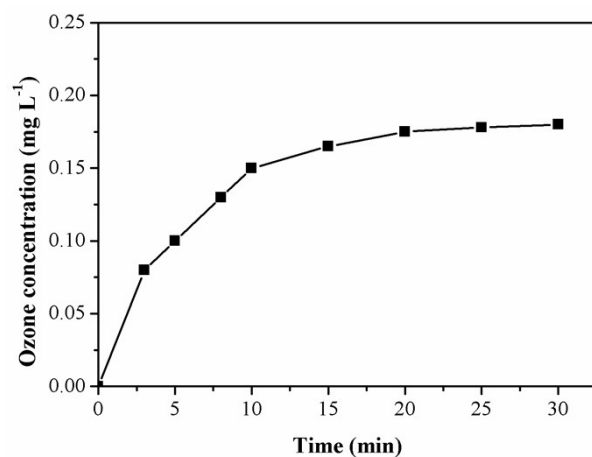

Fig. S2 Ozone concentration in ultra-pure water under experimental conditions

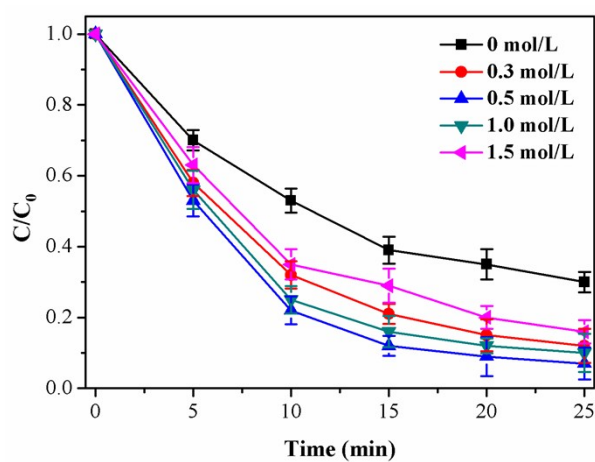

Fig. S3. Effect of impregnation concentration on ozonation of TCH with CoSO.

pH = 7.0; initial TCH = 30 mg L<sup>-1</sup>; T = 20 °C; gaseous ozone = 1.0 mg L<sup>-1</sup>; catalyst = 1.0 g L<sup>-1</sup>.

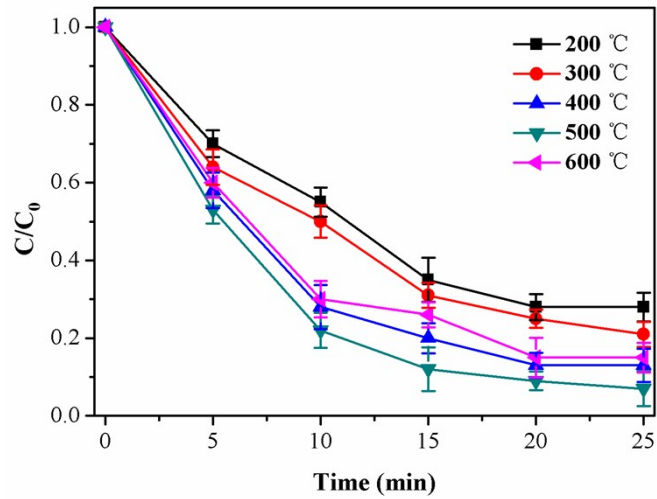

Fig. S4 Effect of calcination temperature on ozonation of TCH with CoSO.  
 pH = 7.0; initial TCH = 30 mg L<sup>-1</sup>; T = 20 °C; gaseous ozone = 1.0 mg L<sup>-1</sup>; catalyst = 1.0 g L<sup>-1</sup>.

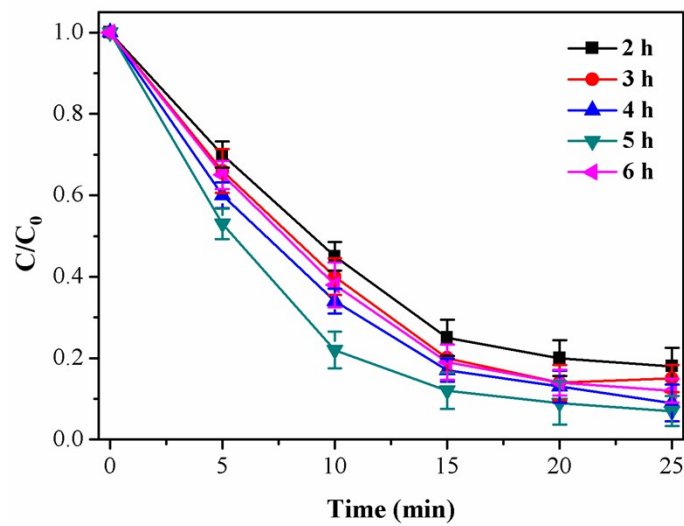

Fig S5. Effect of calcination time on ozonation of TCH with CoSO.  
 pH = 7.0; initial TCH = 30 mg L<sup>-1</sup>; T = 20 °C; gaseous ozone = 1.0 mg L<sup>-1</sup>; catalyst = 1.0 g L<sup>-1</sup>.

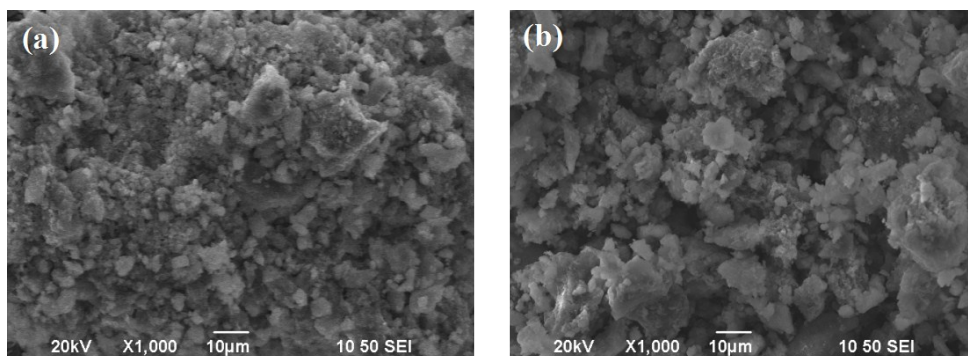

Fig. S6 SEM images of the samples SO (a) and CoSO (b).

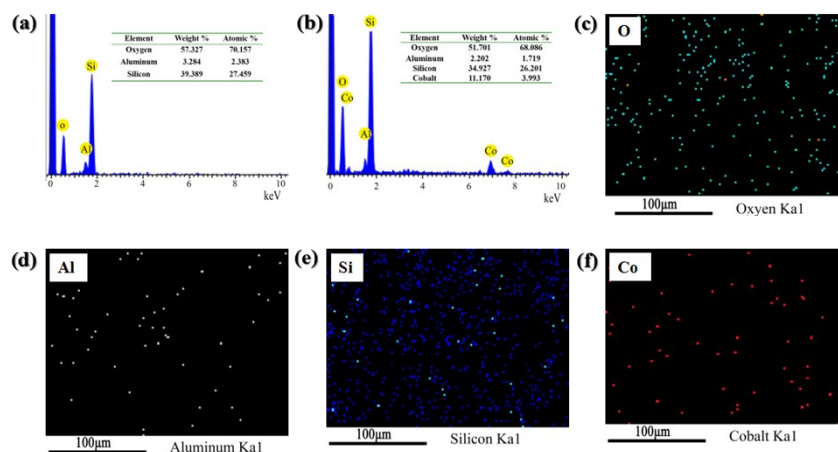

Fig. S7 EDS spectrum of (a) SO, (b) CoSO, and (c)-(f) elemental mapping of the CoSO catalyst .

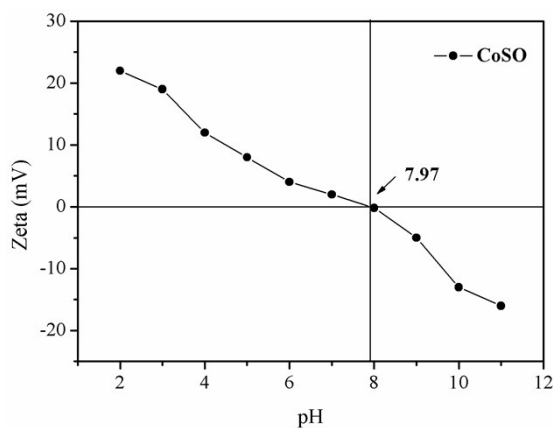

Fig. S8. Zeta potential of CoSO.

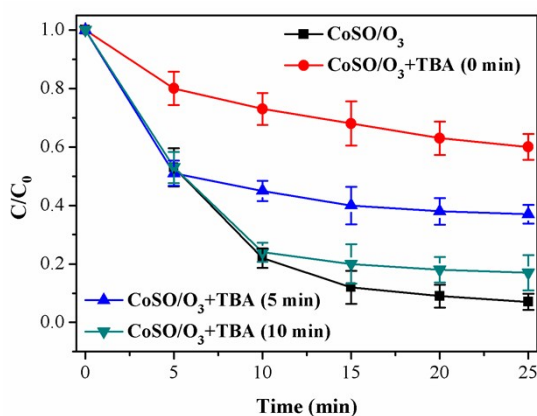

Fig. S9 Influence of TBA on catalytic ozonation of TCH. Initial pH = 7.0; initial TCH = 30 mg L<sup>-1</sup>; T = 20 °C; gaseous ozone = 1.0 mg L<sup>-1</sup>; catalyst = 1.0 g L<sup>-1</sup>.

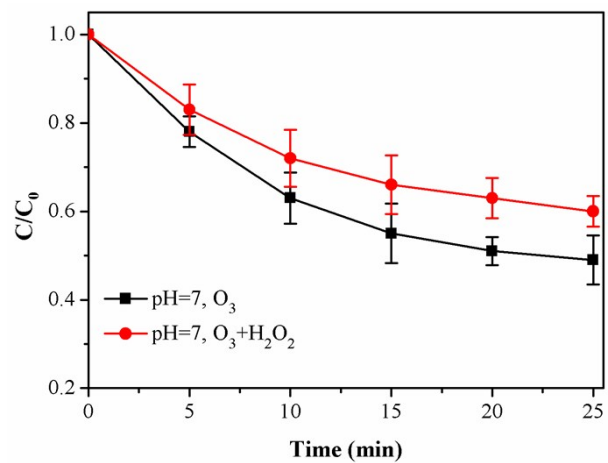

Fig. S10. Degradation efficiency of TCH in the presence of hydrogen peroxide. Initial pH = 7.0; initial TCH = 30 mg L<sup>-1</sup>; T = 20 °C; gaseous ozone = 1.0 mg L<sup>-1</sup>; catalyst = 1.0 g L<sup>-1</sup>. H<sub>2</sub>O<sub>2</sub> = 10 μmol L<sup>-1</sup>
